# Supplementary material
Source: publisher figshare collection journal article supplement (https://frontiersin.figshare.com/ndownloader/files/22052832)
Supplement: Supplementary file 1 [file 22052832]

Supplementary Table 1. Summary areas for all 1997-2010 LULC change classes mapped in the LMB region containing SBs 1-8.

| **LULC Change Class #** | **1997 LULC Class Description** | **2010 LULC Class Description** | **Common Total Area (km2)** | **% Total Area** | **Rank** |
| --- | --- | --- | --- | --- | --- |
| 11 | Barren | Barren | 1,071.3 | 0.24% | 25 |
| 12 | Barren | Urban/Built-Up | 0.6 | 0.00% | 71 |
| 13 | Barren | Permanent Agriculture | 77.8 | 0.02% | 43 |
| 14 | Barren | Shifting Cultivation | 17.0 | 0.00% | 56 |
| 15 | Barren | Scrub/Shrub/Herbaceous | 412.6 | 0.09% | 29 |
| 16 | Barren | Deciduous Forest/Scrub | 404.8 | 0.09% | 31 |
| 17 | Barren | Evergreen Forest | 244.7 | 0.05% | 33 |
| 18 | Barren | Industrial Forest Plantation | 0.1 | 0.00% | 77 |
| 19 | Barren | Wetland Cover | 2.5 | 0.00% | 65 |
| 21 | Urban/Built-Up | Barren | 0.2 | 0.00% | 75 |
| 22 | Urban/Built-Up | Urban/Built-Up | 178.4 | 0.04% | 35 |
| 23 | Urban/Built-Up | Permanent Agriculture | 164.4 | 0.04% | 36 |
| 24 | Urban/Built-Up | Shifting Cultivation | 2.6 | 0.00% | 64 |
| 25 | Urban/Built-Up | Scrub/Shrub/Herbaceous | 23.1 | 0.01% | 51 |
| 26 | Urban/Built-Up | Deciduous Forest/Scrub | 7.2 | 0.00% | 60 |
| 27 | Urban/Built-Up | Evergreen Forest | 1.4 | 0.00% | 67 |
| 29 | Urban/Built-Up | Wetland Cover | 1.7 | 0.00% | 66 |
| 31 | Permanent Agriculture | Barren | 162.1 | 0.04% | 37 |
| 32 | Permanent Agriculture | Urban/Built-Up | 1,653.2 | 0.37% | 23 |
| 33 | Permanent Agriculture | Permanent Agriculture | 130,539.7 | 28.92% | 2 |
| 34 | Permanent Agriculture | Shifting Cultivation | 2,948.4 | 0.65% | 20 |
| 35 | Permanent Agriculture | Scrub/Shrub/Herbaceous | 15,667.6 | 3.47% | 5 |
| 36 | Permanent Agriculture | Deciduous Forest/Scrub | 7,809.0 | 1.73% | 9 |
| 37 | Permanent Agriculture | Evergreen Forest | 4,896.7 | 1.08% | 15 |
| 38 | Permanent Agriculture | Industrial Forest Plantation | 1,543.1 | 0.34% | 24 |
| 39 | Permanent Agriculture | Wetland Cover | 248.0 | 0.05% | 32 |
| 41 | Shifting Cultivation | Barren | 76.7 | 0.02% | 44 |
| 42 | Shifting Cultivation | Urban/Built-Up | 21.1 | 0.00% | 53 |
| 43 | Shifting Cultivation | Permanent Agriculture | 5,028.4 | 1.11% | 14 |
| 44 | Shifting Cultivation | Shifting Cultivation | 2,675.3 | 0.59% | 21 |
| 45 | Shifting Cultivation | Scrub/Shrub/Herbaceous | 4,268.4 | 0.95% | 16 |
| 46 | Shifting Cultivation | Deciduous Forest/Scrub | 7,128.8 | 1.58% | 10 |
| 47 | Shifting Cultivation | Evergreen Forest | 5,294.8 | 1.17% | 12 |
| 48 | Shifting Cultivation | Industrial Forest Plantation | 133.3 | 0.03% | 39 |
| 49 | Shifting Cultivation | Wetland Cover | 19.3 | 0.00% | 55 |
| 51 | Scrub/Shrub/Herbaceous | Barren | 19.7 | 0.00% | 54 |
| 52 | Scrub/Shrub/Herbaceous | Urban/Built-Up | 4.2 | 0.00% | 62 |
| 53 | Scrub/Shrub/Herbaceous | Permanent Agriculture | 2,103.8 | 0.47% | 22 |
| 54 | Scrub/Shrub/Herbaceous | Shifting Cultivation | 955.0 | 0.21% | 26 |
| 55 | Scrub/Shrub/Herbaceous | Scrub/Shrub/Herbaceous | 752.2 | 0.17% | 28 |
| 56 | Scrub/Shrub/Herbaceous | Deciduous Forest/Scrub | 3,906.1 | 0.87% | 18 |
| 57 | Scrub/Shrub/Herbaceous | Evergreen Forest | 780.7 | 0.17% | 27 |
| 58 | Scrub/Shrub/Herbaceous | Industrial Forest Plantation | 3.0 | 0.00% | 63 |
| 59 | Scrub/Shrub/Herbaceous | Wetland Cover | 1.3 | 0.00% | 68 |
| 61 | Deciduous Forest/Scrub | Barren | 43.6 | 0.01% | 46 |
| 62 | Deciduous Forest/Scrub | Urban/Built-Up | 31.6 | 0.01% | 48 |
| 63 | Deciduous Forest/Scrub | Permanent Agriculture | 10,373.0 | 2.30% | 7 |
| 64 | Deciduous Forest/Scrub | Shifting Cultivation | 3,887.3 | 0.86% | 19 |
| 65 | Deciduous Forest/Scrub | Scrub/Shrub/Herbaceous | 5,119.0 | 1.13% | 13 |
| 66 | Deciduous Forest/Scrub | Deciduous Forest/Scrub | 22,882.0 | 5.07% | 4 |
| 67 | Deciduous Forest/Scrub | Evergreen Forest | 3,955.6 | 0.88% | 17 |
| 68 | Deciduous Forest/Scrub | Industrial Forest Plantation | 32.8 | 0.01% | 47 |
| 69 | Deciduous Forest/Scrub | Wetland Cover | 16.1 | 0.00% | 57 |
| 71 | Evergreen Forest | Barren | 406.7 | 0.09% | 30 |
| 72 | Evergreen Forest | Urban/Built-Up | 21.1 | 0.00% | 52 |
| 73 | Evergreen Forest | Permanent Agriculture | 6,099.0 | 1.35% | 11 |
| 74 | Evergreen Forest | Shifting Cultivation | 8,412.3 | 1.86% | 8 |
| 75 | Evergreen Forest | Scrub/Shrub/Herbaceous | 12,357.1 | 2.74% | 6 |
| 76 | Evergreen Forest | Deciduous Forest/Scrub | 36,928.3 | 8.18% | 3 |
| 77 | Evergreen Forest | Evergreen Forest | 138,738.2 | 30.74% | 1 |
| 78 | Evergreen Forest | Industrial Forest Plantation | 115.2 | 0.03% | 40 |
| 79 | Evergreen Forest | Wetland Cover | 73.3 | 0.02% | 45 |
| 81 | Industrial Forest Plantation | Barren | 0.1 | 0.00% | 78 |
| 82 | Industrial Forest Plantation | Urban/Built-Up | 10.6 | 0.00% | 59 |
| 83 | Industrial Forest Plantation | Permanent Agriculture | 92.7 | 0.02% | 42 |
| 84 | Industrial Forest Plantation | Shifting Cultivation | 25.4 | 0.01% | 50 |
| 85 | Industrial Forest Plantation | Scrub/Shrub/Herbaceous | 30.3 | 0.01% | 49 |
| 86 | Industrial Forest Plantation | Deciduous Forest/Scrub | 152.6 | 0.03% | 38 |
| 87 | Industrial Forest Plantation | Evergreen Forest | 212.6 | 0.05% | 34 |
| 88 | Industrial Forest Plantation | Industrial Forest Plantation | 103.8 | 0.02% | 41 |
| 89 | Industrial Forest Plantation | Wetland Cover | 0.1 | 0.00% | 76 |
| 91 | Wetland Cover | Barren | 0.2 | 0.00% | 74 |
| 92 | Wetland Cover | Urban/Built-Up | 0.4 | 0.00% | 72 |
| 93 | Wetland Cover | Permanent Agriculture | 15.4 | 0.00% | 58 |
| 94 | Wetland Cover | Shifting Cultivation | 1.0 | 0.00% | 69 |
| 95 | Wetland Cover | Scrub/Shrub/Herbaceous | 4.9 | 0.00% | 61 |
| 96 | Wetland Cover | Deciduous Forest/Scrub | 0.8 | 0.00% | 70 |
| 99 | Wetland Cover | Wetland Cover | 0.3 | 0.00% | 73 |
| Total | All | All | 451,393.65 | 100.00% | N/A |
